# Supplementary material for: Assessing soil compaction and micro-topography impacts of alternative heather cutting as compared to burning as part of grouse moor management on blanket bog
Source: PeerJ. 2019 Jul 18;7:e7298. doi: 10.7717/peerj.7298 (PMC6642791; doi:10.7717/peerj.7298)
Supplement: Supplemental Information 2 — Micro-topography data for each plot at each site measured up to 45 time as the offset (cm) from the peat surface across each plot. [file peerj-07-7298-s002.xlsx]

## Sheet: Info
Sites (3):	Code
Nidderdale	N
Mossdale	M
Whitendale	W
Treatment	Code
Burnt (fire)	FI
Uncut (do nothing)	DN
Mown left brash	LB
Mown brash removed	BR
Sphagnum addion	Sp
Meaurements	Offset (cm)
(with ruler)	(from peat surface
	Missing data
	#NAN

## Sheet: Microtopo offsets (cm)
NFI	NDN	NLB	NLBSp	NBR	NBRSp		MFI	MDN	MLB	MLBSp	MBR	MBRSp		WFI	WDN	WLB	WLBSp	WBR	WBRSp
-14	11	-2	-1	1	-3		-7	-2	1	-4	-1	0		1	2	0	-7	-2	-13
1	-13	-2	0	-1	-4		0	-5	1	-7	1	3		-3	-6	-6	0	-6	0
-2	-7	-5	1	-10	-4		0	-6	1	-4	3	-2		-3	-4	-7	-3	-6	0
3	-12	-3	0	-6	0		-1	0	1	-5	2	-9		-5	-6	-2	-1	-4	0
6	-2	-8	3	-7	-2		0	0	0	-7	3	-2		-6	1	-4	-7	-2	0
7	-10	-14	1	-9	0		3	-2	2	-7	3	2		-18	0	-5	-5	-7	-3
-7	-1	-4	4	-9	0		1	-2	-2	-4	4	-1		-2	0	0	-5	-6	-10
-3	0	-4	0	-8	1		3	-10	-4	-3	3	-2		-3	-2	-1	-10	-3	-4
4	-1	-1	1	-6	7		0	-4	0	-8	2	-3		1	-2	0	-4	-8	-9
0	-6	-3	1	-1	-1		1	-4	0	-3	1	0		2	-11	-3	1	-4	-4
1	-15	-3	1	1	-2		3	-5	0	-2	1	-2		-2	1	0	0	0	0
1	-10	-4	4	-1	0		6	-5	0	-3	-2	-8		-1	0	0	-2	-1	-2
4	-7	-5	9	-6	-4		3	-4	-1	-3	-1	-4		-5	1	0	-2	0	0
5	-8	-8	5	-1	3		-20	1	-2	-2	3	2		-14	-5	-1	-4	-3	1
3	-10	-5	8	-4	9		3	-2	-3	-5	4	0		-12	1	-4	-2	-4	-2
5	4	-3	11	-6	9		8	3	-2	-2	3	-3		-10	-2	-2	-2	-3	-10
6	4	-4	-3	-5	6		0	1	-5	2	0	-2		-10	-13	-2	-21	-4	-3
2	1	-4	1	-6	9		5	0	-4	2	-2	-3		10	-5	-1	0	-15	-3
-3	-4	-2	1	-3	-1		0	-7	-1	-2	-1	-4		0	-1	-4	-1	-1	-14
-10	-3	-7	5	1	1		-2	-2	-7	-4	-1	-2		8	-1	2	-2	2	-7
-2	-6	-10	0	-3	-1		-8	1	-5	-4	-3	-6		2	2	-2	-2	2	-10
-13	-2	-8	3	-6	7		0	4	-4	-3	-2	-3		-6	-6	4	-10	-7	-3
1	0	-7	-3	-5	#NAN		1	2	-7	-4	-3	-1		-3	1	-2	-9	-8	-4
2	1	-15	3	-9	#NAN		5	3	-8	-2	-2	6		-3	3	-7	-3	-1	-5
4	4	-17	4	-9	7		5	1	-4	-15	-2	-5		-18	3	0	-5	-1	-1
-15	4	-4	-1	-7	3		6	1	-5	0	-2	-1		-6	1	-1	-4	-2	-2
-16	#NAN	-10	-3	-9	5		3	0	-4	-1	-4	-2		-7	0	1	-13	-13	-7
-1	-3	-4	-3	1	1		3	-3	-6	-10	0	-4		0	3	1	-6	3	-2
-10	-7	-10	0	0	2		-3	1	-2	2	-4	-7		2	0	2	-9	1	0
0	-2	-15	-1	-4	5		-4	10	-2	2	-3	-7		2	0	0	-1	-1	-2
24	2	-9	-4	-3	#NAN		-2	12	-4	2	-4	-6		5	-3	1	-3	-1	-3
6	1	-6	-5	-16	#NAN		-2	8	-8	4	-4	-6		7	0	0	-1	-1	-2
1	5	-9	-3	-13	7		3	5	-4	4	-3	-7		9	-8	0	-3	-9	-7
-4	2	-10	0	-8	5		1	0	-4	3	-4	-5		-1	-1	0	-4	-11	-3
1	10	-4	0	-8	1		1	0	-4	3	-2	-9		6	-2	-2	-1	-2	-3
0	#NAN	-5	0	-3	1		-16	0	-6	0	-2	-6		-1	-1	-3	0	-13	-14
-9	-3	-8	0	1	1		2	-1	-2	-1	-10	-2		-6	3	3	-3	-4	-1
-6	-3	-8	-3	-4	4		1	-2	-7	-1	-11	-9		-7	-15	1	-4	-6	-3
0	0	-8	-4	-7	#NAN		2	-3	-7	3	-7	-3		-4	-16	3	-10	-4	-3
-12	2	-11	-1	-6	4		0	0	-4	2	-7	-7		-3	-1	-2	-10	-9	0
4	8	-8	-1	-7	0		4	6	-5	6	-6	1		8	1	-3	-7	-14	-2
1	8	-8	0	-10	-8		1	8	-7	6	-6	-2		3	-1	-6	-1	-6	-3
1	10	-8	1	-16	8		4	2	-5	2	-4	-2		5	-1	-2	-13	-8	-8
0	4	-9	7	-7	-1		0	-5	-7	1	-5	-2		0	-1	-5	-12	-5	-3
0	-5	-3	-6	-6	0		-9	0	-5	-2	-8	-3		0	-10	0	-14	-2	-3
0	-2	-1	-1	3	1		-5	-6	-1	0	4	-2		2	4	-2	-4	1	-1
-1	2	0	-1	-1	-3		-7	-3	-7	-3	2	1		2	1	-2	-2	-2	-1
-4	-7	0	-3	0	1		-6	0	-4	-6	0	2		-5	4	-3	-1	-2	-3
-4	-10	1	-4	3	1		-10	-10	-6	-9	1	3		-14	0	-2	-4	-5	-2
-2	1	-1	-4	3	-5		-10	-7	-5	-11	8	1		-15	4	-1	-1	-6	-5
10	-5	-3	1	-1	-3		-12	2	-3	-5	8	0		-9	0	-1	-5	-8	-2
6	-16	-2	0	0	-8		-10	-7	-10	-8	7	0		-6	2	0	-4	-3	0
6	-1	-2	-2	-1	-5		-12	2	-6	-7	-6	0		-8	-1	0	1	-2	2
3	-5	-2	0	0	-1		-12	1	-4	-11	-4	1		-3	0	-1	-5	-1	-1
2	-9	-4	0	0	-4		-1	-13	-3	-2	2	0		-1	5	-1	-1	-1	0
0	-2	1	0	-2	-1		-2	-5	2	-5	7	-1		-17	2	-1	2	1	-1
-5	1	2	0	0	-1		-6	-8	1	-9	10	2		-6	7	-2	-2	-1	0
-3	5	0	3	0	-1		-12	-4	0	-10	10	2		-11	8	-3	-2	0	0
1	2	3	-2	0	-2		-11	-2	-1	-5	1	2		-17	6	-2	-2	0	1
1	-8	-3	-2	6	-10		-14	-1	0	-11	5	-1		-14	9	1	-2	-4	-1
9	-1	-3	-1	5	-1		-8	-6	-1	-9	0	1		-8	7	2	-3	-1	2
7	-1	-3	-3	1	-3		-8	-2	-11	-9	-5	1		-4	4	4	-6	-2	3
2	2	0	-1	6	-6		-6	0	-4	-9	-5	1		-12	-2	4	-2	-2	2
-1	1	0	1	1	0		2	-3	-2	-9	2	0		-4	4	-6	-2	-2	-5
1	-2	-2	-1	7	0		1	4	-2	0	6	2		0	2	-4	1	1	0
2	8	2	0	5	-1		-6	-4	-2	-8	5	1		-4	-7	-5	-5	-5	-3
6	-2	0	3	2	-10		-8	0	-4	-4	5	2		3	3	-5	-5	-2	-8
8	-14	0	0	2	-7		-3	0	-2	-6	4	1		-2	-2	-4	1	-3	0
7	1	4	-3	4	1		-5	1	1	-4	8	-3		-21	4	-2	-1	-4	-1
6	-1	4	2	2	-1		-13	0	1	-2	4	3		-21	-5	0	-4	-5	0
-2	-10	2	0	3	-2		-4	-3	-5	0	2	6		-16	4	-1	-5	-6	0
-1	-6	0	2	5	-12		0	0	-2	2	-12	-4		-10	0	0	-5	-5	0
4	-2	3	-2	2	-3		2	-8	-2	-4	-10	-2		0	4	-6	-6	-3	-5
7	3	-1	-2	1	2		-6	-6	-7	1	0	0		2	6	-2	3	-3	0
6	-9	2	1	1	-2		-9	-6	-2	-9	-4	1		-7	6	-4	5	-3	-3
7	1	0	0	3	-4		-6	0	0	0	0	1		4	5	-1	-3	-3	-8
11	-3	2	-3	1	-2		-9	-1	-6	-2	5	1		-1	5	-1	-3	-4	0
10	-9	1	-2	-16	1		-6	0	-2	-5	3	0		-20	-6	-4	-2	-8	-1
9	-7	0	0	2	1		-6	0	-6	-2	-3	-3		-16	3	0	-4	-8	0
4	-4	-7	0	1	1		-5	-2	-3	-3	1	-3		-17	2	-1	-4	-3	0
3	-2	0	-4	-3	1		-3	0	-8	0	-2	-5		-6	-1	0	-9	-2	0
7	-6	-4	-3	4	1		-1	2	0	1	1	1		-2	3	3	-1	0	2
14	4	-1	-5	2	-4		3	1	-2	0	4	0		-14	5	0	0	-5	0
14	-7	-8	-10	7	7		3	0	-1	1	6	-4		-1	-2	0	-5	-3	-3
12	5	-7	-1	6	2		-2	0	-3	2	8	-2		-10	4	-4	0	2	2
19	5	-2	-3	3	1		-11	0	0	12	7	-3		1	0	0	-5	-7	2
18	5	-2	0	5	1		-14	6	-2	2	5	-6		-21	10	0	-6	-5	1
14	6	-2	0	4	-7		-8	5	1	2	-3	-6		-10	-1	-4	-8	-5	0
13	0	-1	0	3	-5		-7	-3	1	-3	3	-6		-9	0	-1	-2	2	1
2	-3	-3	0	-1	0		-3	0	5	-1	0	-5		-6	-2	-1	-5	-5	-2
-1	-3	-5	-4	-8	-4		1	-1	0	1	0	0		-6	-3	1	-2	0	-7
-2	-4	-4	-3	-7	-7		3	0	1	-1	-2	2		8	5	-5	-2	0	0
2	0	-8	-13	-8	-8		-2	-3	2	-4	-5	2		8	5	-2	-2	-2	1
3	2	-9	-9	-9	-9		1	-8	-11	-2	-9	2		8	0	-3	1	-2	0
2	3	-10	-7	-10	-9		-1	-1	0	1	-4	0		14	-6	-4	-2	-5	-3
1	-3	-10	-8	-8	-8		-8	-3	-2	-2	-3	1		-6	0	-2	-2	-2	-2
1	0	-3	-5	-10	-6		7	-10	-3	-6	-10	0		-2	-5	-2	-2	0	-6
1	-3	-1	-2	-5	-3		-5	-8	-10	-4	-1	1		-5	5	-5	0	-2	-4
4	-3	3	0	0	-2		9	-6	-4	-3	-1	-2		-6	-6	-4	-2	-2	-1
0	-2	-6	-4	0	-3		3	1	-3	-5	0	-2		6	-9	1	-2	0	0
1	-9	-5	-6	1	-5		-1	3	-3	-6	0	0		8	7	-6	-9	-5	0
7	-5	-3	-8	-4	-6		-1	0	-6	-3	-5	-3		8	5	-5	-1	-5	-5
-1	-1	-2	-7	-4	-6		1	-2	1	-2	-2	-5		8	-5	0	-1	-4	2
-2	0	-15	-12	-3	-9		8	-3	-2	0	-1	-1		10	4	-6	-1	-4	1
-10	0	-9	-10	-3	-5		6	0	-2	-11	-9	-6		-8	5	-6	-8	1	0
-2	-1	-8	-4	-4	-3		6	0	-3	-9	-5	0		-18	5	-9	1	0	-1
-2	-1	-3	-2	-2	-3		-1	2	-7	-4	-2	-7		-22	1	-2	1	0	-5
-1	-4	2	0	-1	-4		-9	0	-9	-2	-1	-6		-3	-13	-8	1	0	0
-9	-1	-1	-4	-1	-4		-8	0	-4	-9	1	-8		-1	-1	-9	-8	0	3
-8	-4	-4	-4	0	-5		10	0	-4	-2	3	-2		21	5	-7	-4	-5	3
0	2	-5	-8	0	-4		5	-3	-15	-3	-2	-3		3	7	-2	-5	-11	3
-8	3	-7	-17	-3	-7		8	-3	-5	0	3	-2		7	7	-2	-5	-11	3
-3	3	-5	-15	-4	-4		6	2	-5	-3	3	-3		6	9	-6	-3	-2	3
-10	1	-12	-10	-4	-3		3	3	-5	-2	1	-6		10	4	0	-1	-7	-1
-3	1	-13	-4	-2	-3		1	-7	-14	-2	0	-10		-5	-12	2	-7	-1	-2
-8	#NAN	-10	-5	2	0		4	5	-10	0	-6	-7		-4	8	1	0	-1	-3
-7	0	-3	0	1	0		1	-1	-1	#NAN	1	-5		2	-2	1	-4	-5	-2
0	-5	-1	-4	0	0		-14	-1	-3	0	-3	1		3	-2	-2	-4	0	-1
-1	-1	-3	-8	0	-2		-6	-5	-4	-8	-2	-5		13	-9	-1	-4	-3	2
-10	-2	-15	-10	0	-10		-8	0	-3	0	-3	0		18	-5	-1	-3	-7	0
-4	-1	-6	-9	-3	-6		-5	-8	-3	0	-3	9		15	5	-1	-4	0	0
-6	0	-10	-13	-7	-10		-1	-6	3	0	-6	0		6	-4	-5	-2	1	-4
-13	1	-11	-10	0	-2		-4	-2	5	0	-4	-1		7	-8	0	-1	0	0
-8	-5	-12	-6	1	-1		4	1	2	-9	-2	0		-12	-4	1	-1	-7	0
-5	3	-10	0	2	-3		3	0	-10	-2	-1	-6		-3	-10	-8	0	0	-4
-3	-3	-4	0	2	0		2	-36	3	-2	-5	0		3	-3	-7	-5	-2	-4
1	-5	-1	0	2	-4		3	-2	-2	-4	0	0		-3	-2	0	0	0	-2
-6	-4	-10	-13	-1	-8		0	1	-1	-9	0	-10		17	2	0	-5	-2	0
-2	-2	-4	-8	0	-7		2	7	-5	-11	3	-3		12	-8	2	-2	-4	-3
-12	-1	-12	-9	-5	-7		2	2	-2	-4	-2	0		18	-6	0	-8	-6	-3
-11	-2	-6	-10	-4	-6		-16	-1	-6	-1	-3	-5		22	7	3	-3	-4	-6
-7	-1	-7	-7	-4	-5		3	8	-11	-2	-4	-2		-2	1	0	-8	0	0
-11	-2	-10	-4	-4	-4		1	1	-10	-4	-5	-5		10	2	2	-9	-4	-3
-4	1	-11	-5	1	-1		0	-2	-7	-6	-3	-9		-2	1	4	0	-6	-1
-2	#NAN	-3	-2	-1	0		-4	0	-7	1	-8	0		-7	1	4	0	-5	-1
7	6	#NAN	-2	0	1		0	-6	1	0	1	-2		1	-2	0	0	-1	-3
6	8	#NAN	-2	0	0		1	-2	-2	-2	-3	0		0	-5	-10	1	1	-4
-2	7	#NAN	-5	-2	0		-1	3	-2	-1	0	-3		-4	-7	2	1	-7	-5
2	7	#NAN	-7	-1	0		7	1	0	2	0	-2		-4	2	2	-3	-7	-13
-4	1	#NAN	-7	-2	1		0	0	-2	-1	3	-10		-9	2	2	-9	2	-2
-6	4	#NAN	-4	-2	3		2	0	0	-8	-6	-9		-10	4	0	1	0	-3
0	5	#NAN	-1	-2	2		0	0	-5	-3	-3	-3		-13	5	0	-2	-6	0
1	-1	#NAN	-2	-2	-1		-1	2	-8	-4	0	3		-10	7	-2	2	-2	-4
#NAN	1	#NAN	-1	-1	-1		-5	0	0	-7	-2	-2		-4	-11	6	-1	-5	-4
0	8	#NAN	0	-3	0		-4	8	1	0	-6	-1		0	-11	-4	0	-5	4
0	7	#NAN	0	-6	0		0	10	0	0	0	4		-1	1	-5	-3	-2	3
-6	2	#NAN	2	-6	0		4	5	1	2	-3	0		-2	2	-3	-5	-2	3
-1	5	#NAN	0	-4	0		3	6	-2	-4	-3	2		-2	-10	-6	0	-10	3
0	6	#NAN	-1	-4	0		0	0	-6	0	-2	1		-5	-2	-2	2	-8	3
-4	2	#NAN	-2	-2	-2		-3	6	-4	2	-7	0		-6	-1	-3	2	-9	5
-4	3	#NAN	1	-3	0		-7	8	-5	-2	-3	-3		-4	0	-4	1	0	4
2	0	#NAN	1	-4	0		-3	4	-3	2	0	2		-6	-2	-4	0	-10	4
2	#NAN	#NAN	0	-1	1		1	3	-3	-2	-7	-2		-4	-16	-4	-1	-6	1
0	5	#NAN	-7	-2	-1		-2	-10	3	1	-1	-1		-2	-3	-4	-2	-3	-11
0	6	#NAN	-2	-4	-2		-8	3	-1	-2	-4	-8		-4	-6	-7	0	3	-2
1	7	#NAN	-2	-3	-4		-3	1	-9	-2	-4	0		-3	-6	-9	-1	1	-4
2	8	#NAN	-1	-3	-4		1	8	-1	-1	0	0		-5	2	-13	0	-6	-3
-1	8	#NAN	-2	-3	-4		0	-5	-4	2	-3	-2		-3	-2	-6	0	-3	-4
2	0	#NAN	0	-4	-2		-5	3	-2	-4	-5	-9		1	-11	-6	0	-4	-2
2	2	#NAN	-1	0	-1		-3	8	-2	-4	0	-1		0	3	-5	0	-2	-2
5	2	#NAN	-2	-3	-2		-12	6	1	0	-3	-3		-12	-9	-3	0	-1	2
1	#NAN	#NAN	0	-4	-2		-2	0	-6	-3	-4	-2		-2	0	-3	0	0	-5
2	3	-2	-1	-1	-4		0	-1	1	-1	-4	-1		-2	-13	-3	-2	0	-2
2	10	6	0	-6	-5		1	7	-2	-5	-2	-1		-1	0	-6	1	-4	-6
4	7	6	0	-5	-7		-2	6	-1	-3	-7	-3		-2	-11	-6	-4	-3	-5
-6	10	8	0	-2	-9		0	-3	-2	-3	0	-2		-14	0	-6	-1	-1	-6
6	7	2	-1	-3	-10		0	4	-1	-3	-4	-1		-8	-2	0	-3	-1	-7
3	7	-7	1	0	-10		4	2	-5	-1	-3	1		-1	2	-6	-1	-5	-10
2	4	-7	-1	0	-8		2	4	-4	-6	1	1		-4	-2	-3	-2	-3	-8
1	3	-3	0	-7	-6		2	7	-8	-1	-2	3		1	-15	-3	-2	-2	-7
6	#NAN	-2	2	0	-4		0	0	-9	-1	0	-4		-3	0	-5	-4	-7	-10
-4	2	-9	0	-4	-4		-2	-4	-4	1	-1	-1		-3	-5	0	-3	-1	-1
1	6	1	0	-2	-5		0	0	-1	0	0	3		-4	1	-14	-9	4	-7
1	-4	8	0	-4	-5		1	1	-7	0	-1	2		-4	-2	0	-3	0	-7
1	-4	3	2	-7	-6		-1	1	-5	-1	-2	1		-5	-14	-2	-4	-1	-10
1	-3	2	0	-14	-8		-6	0	-5	-2	0	1		-4	-6	4	-7	-2	-16
0	-7	-4	1	-4	-9		-5	2	-10	-1	-3	2		-2	-14	2	-4	-3	-12
-2	-2	-7	0	-4	-6		1	4	-7	-3	-4	3		0	1	3	-1	-2	-13
-5	-1	-5	-2	#NAN	-3		-3	6	-11	-2	-1	3		1	2	4	-3	-2	-14
0	#NAN	-5	0	#NAN	-3		-2	0	-5	-4	-5	-5		2	-8	0	-2	-10	-5
