# Supplementary material for: Assessing soil compaction and micro-topography impacts of alternative heather cutting as compared to burning as part of grouse moor management on blanket bog
Source: PeerJ. 2019 Jul 18;7:e7298. doi: 10.7717/peerj.7298 (PMC6642791; doi:10.7717/peerj.7298)
Supplement: Supplemental Information 3 — Each data point provides the peat depth (cm) at each plot per site for both before and after management. [file peerj-07-7298-s003.xlsx]

## Sheet: Info
Sites (3):	Code
Nidderdale	N
Mossdale	M
Whitendale	W
Management	Code
Control Catchment	C
Burnt (fire) C	FI
Treatment Catchment	T
Uncut (do nothing)	DN
Mown left brash	LB
Mown brash removed	BR
Sphagnum addion	Sp
Meaurements	Depth (cm)
(with rod/corer)	(from peat surface)
	Missing data
	#NAN

## Sheet: Peat Deph (cm)
Site & Catchment	Plot	Peat depth (before)	Repeated (after) mow/burn
Code/Plot No	Treatment	(cm)	(cm)
NC 1	FI	145.5	136
NC 2	FI	140.5	139
NC 3	FI	186.5	198
NC 4	FI	235.5	238
NT 1	BR	181.5	184
NT 2	Sp	155	152
NT 3	BRSp	174.5	165
NT 4	DN	142	134
NT 5	LB	194.5	195
NT 6	DN	145.5	148
NT 7	Sp	192.5	205
NT 8	LB	155	163
NT 9	BR	171.5	167
NT 10	BRSp	144	147
NT 11	BR	125.5	122
NT 12	Sp	143	139
NT 13	BRSp	142.5	133
NT 14	DN	135.5	133
NT 15	LB	138	122
NT 16	BR	143.5	132
NT 17	Sp	103	88
NT 18	BRSp	126	123
NT 19	DN	106.5	105
NT 20	LB	106	101
MC 1	FI	137.5	145
MC 2	FI	140.5	144
MC 3	FI	96.5	92
MC 4	FI	78	90
MT 1	BR	74.5	74
MT 2	Sp	80	90
MT 3	DN	70	67
MT 4	BRSp	84.5	80
MT 5	LB	86.5	86
MT 6	BR	154.5	148
MT 7	Sp	157.5	167
MT 8	BRSp	170.5	167
MT 9	DN	186	160
MT 10	LB	154	153
MT 11	LB	83	89
MT 12	BRSp	102.5	107
MT 13	DN	109.5	118
MT 14	Sp	120	122
MT 15	BR	150.5	150
MT 16	BR	183.5	181
MT 17	Sp	169.5	165
MT 18	BRSp	131.5	130
MT 19	LB	181	196
MT 20	DN	140	126
WC 1	FI	154.5	144
WC 2	FI	136.5	125
WC 3	FI	131	135
WC 4	FI	234	235
WT 1	BR	212	216
WT 2	Sp	191	198
WT 3	BRSp	153	162
WT 4	DN	179.5	171
WT 5	LB	188.5	188
WT 6	BR	173.5	184
WT 7	Sp	197.5	224
WT 8	DN	194.5	194
WT 9	BRSp	181.5	183
WT 10	LB	171	171
WT 11	DN	171.5	179
WT 12	LB	153.5	156
WT 13	BRSp	119.5	136
WT 14	Sp	130.5	133
WT 15	BR	125.5	126
WT 16	LB	159.5	158
WT 17	BRSp	162.5	167
WT 18	DN	163	170
WT 19	Sp	138.5	142
WT 20	BR	78	83
